# Supplementary material for: Numerical modeling investigations of the impact of a thin p-type cocatalyst modifier on an n-type photon absorber for unbiased overall solar water splitting
Source: Royal Society of Chemistry journal article supplement (doi:10.1039/d2ma00947a), 2022-01-01
Supplement: d2ma00947a1.pdf [file d2ma00947a1.pdf]

## Supporting Information

Numerical modeling investigations of the impact of a thin p-type cocatalyst modifier on an n-type photon absorber for unbiased overall solar water splitting

HanHsuan Huang,<sup>a</sup> Kesiuke Obata,<sup>a</sup> Fuminao Kishimoto,<sup>a</sup> and Kazuhiro Takanabe\*<sup>a</sup>

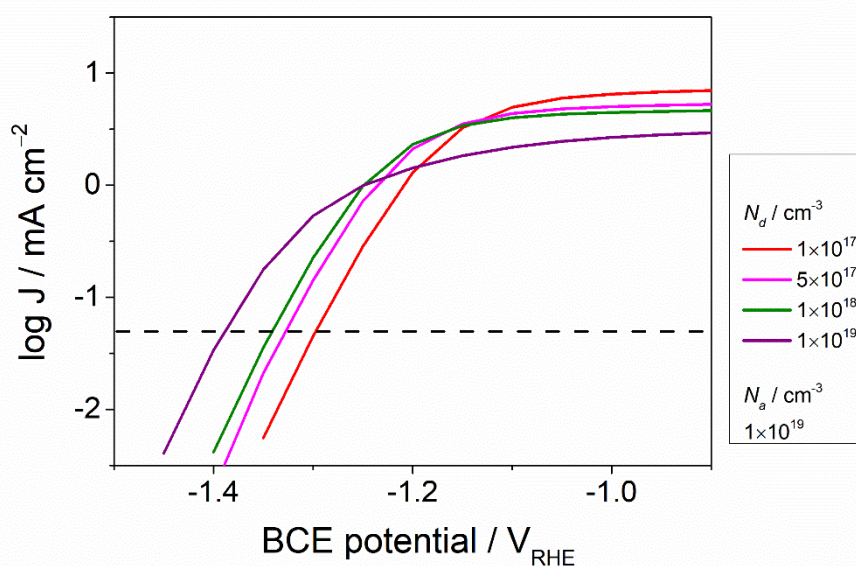

Fig. S1 Semi-log current-potential of p-n junction photoanode, which is replotted from Fig. 5a in the main text, with varied donor density in the n-type photoanode ( $N_d$ ) from  $1 \times 10^{17} \text{ cm}^{-3}$  to  $1 \times 10^{19} \text{ cm}^{-3}$ ,  $N_a = 1 \times 10^{19} \text{ cm}^{-3}$ . The dashed line shows  $0.05 \text{ mA cm}^{-2}$  where the onset potential is defined.
